# Supplementary figures and images for: Synthesis of a super-absorbent nanocomposite hydrogel based on vinyl hybrid silica nanospheres and its properties
Source: Royal Society of Chemistry journal article supplement (doi:10.1039/d0ra07074b), 2020-01-01

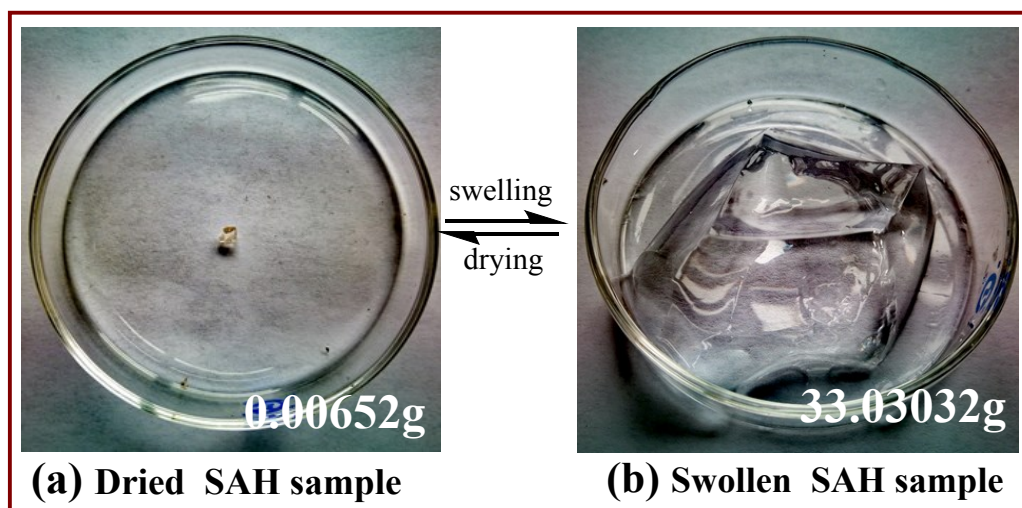

**Supporting information Fig. S 1 a**

Supplement: d0ra07074b1.pdf [file d0ra07074b1.pdf]
